# Supplementary material for: STAT3/NF‐κB signalling disruption in M2 tumour‐associated macrophages is a major target of PLGA nanocarriers/PD‐L1 antibody immunomodulatory therapy in breast cancer
Source: PubMed Central journal article supplement — Br J Pharmacol. 2021 Mar 31;178(11):2284–304. doi: 10.1111/bph.15373 (PMC8251773; doi:10.1111/bph.15373), 2021-03-31
Supplement: BPH-178-2284-s001.pdf [file BPH-178-2284-s001.pdf]

## SUPPLEMENTARY DATA

### **STAT3/NF- $\kappa$ B signalling disruption in M2 tumour-associated macrophages is a major target of PLGA nanocarriers/PD-L1 antibody immunomodulatory therapy in breast cancer**

Rômulo S. Cavalcante<sup>a,b</sup>, Uta Ishikawa<sup>b</sup>, Emanuell S. Silva<sup>d,e</sup>, Arnóbio A. Silva Júnior<sup>a,d,e</sup>, Aurigena A. Araújo<sup>c</sup>, Luis J. Cruz<sup>f</sup>, Alan B. Chan<sup>f,g</sup>, Raimundo F. Araújo Júnior<sup>1,2,7\*</sup>

<sup>a</sup>Postgraduate Program in Health Science, Federal University of Rio Grande do Norte, 59064 741, Natal, RN, Brazil.

<sup>b</sup>Cancer and Inflammation Research Laboratory, Department of Morphology, Federal University of Rio Grande do Norte, 59064 741, Natal, RN, Brazil.

<sup>c</sup>Postgraduate Program in Pharmaceutical Science, Department of Biophysics and Pharmacology, Federal University of Rio Grande do Norte, 59064 741, Natal, RN, Brazil.

<sup>d</sup>Postgraduate Program in Development and Technological Innovation in Medicines, Federal University of Rio Grande do Norte, Natal, RN, Brazil.

<sup>e</sup>Laboratory of Pharmaceutical Technology and Biotechnology, Department of Pharmacy, Federal University of Rio Grande do Norte, 59012 570, Natal, RN, Brazil.

<sup>f</sup>Translational Nanobiomaterials and Imaging, Department of Radiology, Leiden University Medical Center, 2333 ZA Leiden, The Netherlands.

<sup>g</sup>Percuros B.V, Zernikedreef 8, 2333 CL, Leiden, The Netherlands.

Data available on request from the authors

**Corresponding author:** Raimundo Fernandes de Araújo Júnior, Radiology Department/ Leiden University Medical Center, Leiden, The Netherlands. Post code: 2333 ZA. +31655620247. [araujojr@cb.ufrn.br](mailto:araujojr@cb.ufrn.br)

**SUPPLEMENTARY TABLES**

**Table S1: Mouse primers sequence, amplicon size and annealing temperature used in this study.**

| <b>Target</b>   | <b>5' → 3' Forward</b>   | <b>5' → 3' Reverse</b> | <b>Amplicon size (pb)</b> | <b>Annealing temperature (°C)</b> | <b>Access number</b> |
|-----------------|--------------------------|------------------------|---------------------------|-----------------------------------|----------------------|
| <i>β-actin</i>  | AGGCCAACCTGTAAAAGATG     | TGTGGTACGAGAGGCATAC    | 107                       | 50.94                             | NM_007393.5          |
| <i>STAT3</i>    | GGGCCTGGTGTGAACTACTC     | GGTATTGCTGCAGGTCGTTG   | 564                       | 54.79                             | NM_213659.3          |
| <i>NFKB</i>     | CCGTCTGTCTGCTCTCTCT      | CGTAGGGATCATCGTCTGCC   | 873                       | 54.08                             | NM_001311126.1       |
| <i>SNAIL</i>    | GACTCCTTCCAGCCTTGGTC     | CCAGTAACCACCCTGCTGAG   | 356                       | 55.04                             | NM_011427.3          |
| <i>IL-10</i>    | GCTCTTGCACTACCAAAGCC     | CTGCTGATCCTCATGCCAGT   | 112                       | 54.65                             | NM_010548.2          |
| <i>CD-68</i>    | CGCCTAGTCCAAGGTCCAAG     | GAAGTGTCCCTTGTGAGGCA   | 488                       | 55.00                             | NM_001291058.1       |
| <i>CD-163</i>   | GGATCTCCGGGATGCTTCTG     | CGCCTGCCAGACGAATATCT   | 878                       | 54.97                             | NM_001170395.1       |
| <i>CCL22</i>    | GAGACAACAGTGGTCCCAGG     | CTGGCACTGTCAATCCCTGT   | 185                       | 54.96                             | NM_009137.2          |
| <i>FADD</i>     | AGAAGAAGAACGCCTCGGTG     | GCTCACAGATTCTGGGCTT    | 101                       | 55.04                             | NM_010175.6          |
| <i>APAF-1</i>   | TTCCAGTGGCAAGGACACAG     | CCACTCTCCACAGGGACAAC   | 567                       | 55.07                             | NM_001042558.1       |
| <i>MDR1</i>     | TCAGCAACAGCAGTCTGGAG     | ACTATGAGCACACCAGCACC   | 79                        | 55.00                             | NM_011075.2          |
| <i>SURVIVIN</i> | AGAACAAAATTGCAAAGGAGACCA | GGCATGTCACTCAGGTCCAA   | 138                       | 54.76                             | NM_009689.2          |
| <i>CD8</i>      | GCTCAGTCATCAGCAACTCG     | ATCACAGGCGAAGTCCAATC   | 197                       | 53.48                             | NM_009857.1          |
| <i>CXCR4</i>    | CATGGAACCGATCAGTGTGAG    | TGAAGGCCAGGATGAGAACG   | 395                       | 54.24                             | NM_009911.3          |

**Supplementary Table S2: Percentage of gene expression modulation by different treatments.**

| <b>Target</b>                  | <b>MTX</b>            | <b>PeiPLGA-MTX</b>    | <b>HA-PeiPLGA-MTX</b> | <b>anti-PD-L1 + HA-PeiPLGA-MTX</b> |
|--------------------------------|-----------------------|-----------------------|-----------------------|------------------------------------|
| <i>FADD</i>                    | Non regulation        | Upregulation (67 %)   | Upregulation (41 %)   | Not applicable                     |
| <i>APAF-1</i>                  | Upregulation (59 %)   | Upregulation (57 %)   | Upregulation (141 %)  | Not applicable                     |
| <i>MDR1</i>                    | Upregulation (9 %)    | Downregulation (17 %) | Downregulation (33 %) | Not applicable                     |
| <i>SURVIVIN</i>                | Non regulation        | Downregulation (44 %) | Downregulation (66 %) | Not applicable                     |
| <i>NF-<math>\kappa</math>B</i> | Downregulation (33 %) | Downregulation (63 %) | Downregulation (51 %) | Not applicable                     |
| <i>SNAIL</i>                   | Downregulation (70 %) | Downregulation (48 %) | Downregulation (45 %) | Not applicable                     |
| <i>STAT3</i>                   | Non regulation        | Downregulation (54 %) | Downregulation (65 %) | Not applicable                     |
| <i>CXCR4</i>                   | Non regulation        | Downregulation (66 %) | Downregulation (28 %) | Not applicable                     |
| <i>CCL22</i>                   | Downregulation (26 %) | Downregulation (56 %) | Downregulation (29 %) | Non regulation                     |
| <i>CD8</i>                     | Downregulation (49 %) | Upregulation (64 %)   | Upregulation (48 %)   | Upregulation (160 %)               |
| <i>CD68</i>                    | Downregulation (40 %) | Upregulation (125 %)  | Upregulation (81 %)   | Downregulation (36 %)              |
| <i>CD163</i>                   | Non regulation        | Downregulation (76 %) | Downregulation (78 %) | Non regulation                     |
| <i>IL-10</i>                   | Non regulation        | Downregulation (46 %) | Downregulation (79 %) | Upregulation (21 %)                |

**Supplementary Table S3: Modulation of protein expression by different treatments expressed in IHC score units.**

| <b>Target</b> | <b>MTX</b>                         | <b>PeiPLGA-MTX</b>      | <b>HA-PeiPLGA-MTX</b>   | <b>anti-PD-L1 + HA-PeiPLGA-MTX</b> |
|---------------|------------------------------------|-------------------------|-------------------------|------------------------------------|
| FADD          | Upregulation (15 un) <sup>a</sup>  | Upregulation (216 un)   | Upregulation (213 un)   | Not applicable                     |
| APAF-1        | Upregulation (69 un)               | Upregulation (124 un)   | Upregulation (162 un)   | Not applicable                     |
| CASPASE-3     | Upregulation (100 un)              | Upregulation (180 un)   | Upregulation (165 un)   | Not applicable                     |
| BCL-2         | Downregulation (96 un)             | Downregulation (96 un)  | Downregulation (159 un) | Not applicable                     |
| NF-κB         | Downregulation (62 un)             | Downregulation (142 un) | Downregulation (155 un) | Not applicable                     |
| STAT3         | Downregulation (75 un)             | Downregulation (184 un) | Downregulation (180 un) | Not applicable                     |
| E-CADHERIN    | Upregulation (53 un)               | Upregulation (104 un)   | Upregulation (103 un)   | Not applicable                     |
| CD163         | Downregulation (4 un) <sup>a</sup> | Downregulation (93 un)  | Downregulation (48 un)  | Downregulation (53 un)             |
| IL-10         | Downregulation (6 un) <sup>a</sup> | Downregulation (176 un) | Downregulation (142 un) | Downregulation (153 un)            |
| TGF-β         | Upregulation (33 un)               | Downregulation (19 un)  | Downregulation (21 un)  | Upregulation (17 un)               |
| CD25          | Upregulation (78 un)               | Upregulation (185 un)   | Upregulation (96 un)    | Upregulation (59 un)               |
| PD-L1         | Downregulation (14 un)             | Downregulation (40 un)  | Downregulation (35 un)  | Downregulation (166 un)            |

<sup>a</sup> Statistically not significant result; NA, not applicable
